# Supplementary material
Source: publisher figshare collection journal article supplement (https://rs.figshare.com/ndownloader/files/21837900)
Supplement: Supplementary file 2 [file 21837900]

## References

- Armbrust, E. V. et al. (2004) The genome of the diatom *Thalassiosira pseudonana*: ecology, evolution, and metabolism. *Science (New York, N.Y.)*. [Online] 306 (5693), 79–86. [online]. Available from: <http://www.ncbi.nlm.nih.gov/pubmed/15459382>.
- Bayen, M. & Dalmon, J. (1975) [Physico-chemical determination of the ploidy of the unicellular alga, *Chlorella pyrenoidosa* (strain 211/8b) (author's transl)]. *Biochimica et biophysica acta*. [Online] 395 (2), 213–219. [online]. Available from: <http://www.ncbi.nlm.nih.gov/pubmed/1138941>.
- Blake, D. P. et al. (2015) Population, genetic, and antigenic diversity of the apicomplexan *Eimeria tenella* and their relevance to vaccine development. *Proceedings of the National Academy of Sciences of the United States of America*. [Online] 112 (38), E5343-50. [online]. Available from: <http://www.ncbi.nlm.nih.gov/pubmed/26354122>.
- Blanc, G. et al. (2010) The *Chlorella variabilis* NC64A Genome Reveals Adaptation to Photosymbiosis, Coevolution with Viruses, and Cryptic Sex. *The Plant Cell*. [Online] 22 (9), 2943–2955. [online]. Available from: <http://www.plantcell.org/lookup/doi/10.1105/tpc.110.076406>.
- Breuer, S. et al. (2006) Regulated polyploidy in halophilic archaea. *PLoS ONE*. [Online] 1 (1), .
- Crary, M. (2012) *Genetic Variability and its Relationship to Acanthamoeba Pathogenesis*. Ohio State University. [online]. Available from: [http://rave.ohiolink.edu/etdc/view?acc\\_num=osu1343831120](http://rave.ohiolink.edu/etdc/view?acc_num=osu1343831120).
- Daniels, J.-P. et al. (2010) Cell biology of the trypanosome genome. *Microbiology and molecular biology reviews : MMBR*. [Online] 74 (4), 552–569. [online]. Available from: <http://www.ncbi.nlm.nih.gov/pubmed/21119017>.
- von Dassow, P. et al. (2008) INTER- AND INTRASPECIFIC RELATIONSHIPS BETWEEN NUCLEAR DNA CONTENT AND CELL SIZE IN SELECTED MEMBERS OF THE CENTRIC DIATOM GENUS *THALASSIOSIRA* (BACILLARIOPHYCEAE). *Journal of Phycology*. [Online] 44 (2), 335–349. [online]. Available from: <http://doi.wiley.com/10.1111/j.1529-8817.2008.00476.x>.

- Drmotá, T. & Král, J. (1997) Karyotype of *Trichomonas vaginalis*. *European Journal of Protistology*. [Online] 33 (2), 131–135. [online]. Available from: <https://linkinghub.elsevier.com/retrieve/pii/S0932473997800302>.
- Dubessay, P. et al. (2001) Effect of large targeted deletions on the mitotic stability of an extra chromosome mediating drug resistance in *Leishmania*. *Nucleic acids research*. [Online] 29 (15), 3231–3240. [online]. Available from: <http://www.ncbi.nlm.nih.gov/pubmed/11470881>.
- Fenchel, T. & Finlay, B. J. (1983) Respiration rates in heterotrophic, free-living protozoa. *Microbial Ecology*. [Online] 9 (2), 99–122. [online]. Available from: <http://link.springer.com/10.1007/BF02015125>.
- Fokin, S. I. et al. (2001) Nuclear reorganization variety in *Paramecium* (Ciliophora: Peniculida) and its possible evolution. *Acta Protozoologica*. 40 (4), 249–261.
- Gerald, N. et al. (2011) Mitosis in the human malaria parasite *Plasmodium falciparum*. *Eukaryotic cell*. [Online] 10 (4), 474–482. [online]. Available from: <http://www.ncbi.nlm.nih.gov/pubmed/21317311>.
- Gibson, W. C. & Miles, M. A. (1986) The karyotype and ploidy of *Trypanosoma cruzi*. *The EMBO journal*. [Online] 5 (6), 1299–1305. [online]. Available from: <http://www.ncbi.nlm.nih.gov/pubmed/3525150>.
- Gorovsky, M. A. (1973) Macro- and micronuclei of *Tetrahymena pyriformis*: a model system for studying the structure and function of eukaryotic nuclei. *The Journal of protozoology*. [Online] 20 (1), 19–25. [online]. Available from: <http://www.ncbi.nlm.nih.gov/pubmed/4632259>.
- Green, J. C. et al. (1996) The life-cycle of *Emiliana huxleyi*: A brief review and a study of relative ploidy levels analysed by flow cytometry. *Journal of Marine Systems*. [Online] 9 (1–2), 33–44. [online]. Available from: <https://linkinghub.elsevier.com/retrieve/pii/0924796396000140>.
- Hildenbrand, C. et al. (2011) Genome copy numbers and gene conversion in methanogenic archaea. *Journal of Bacteriology*. [Online] 193 (3), 734–743.
- Joo, S. et al. (2017) Gene Regulatory Networks for the Haploid-to-Diploid Transition of *Chlamydomonas reinhardtii*. *Plant physiology*. [Online] 175 (1), 314–332. [online]. Available from: <http://www.ncbi.nlm.nih.gov/pubmed/28710131>.
- Katz, E. R. & Sussman, M. (1972) Parasexual recombination in *Dictyostelium discoideum*: selection of stable diploid heterozygotes and stable haploid segregants

- (clones-temperature sensitive-ploidy-fruiting bodies-spore-slime mold).  
*Proceedings of the National Academy of Sciences of the United States of America*.  
 [Online] 69 (2), 495–498. [online]. Available from:  
<http://www.ncbi.nlm.nih.gov/pubmed/4501129>.
- Makarieva, A. M. et al. (2005) Energetics of the smallest: do bacteria breathe at the same rate as whales? *Proceedings of the Royal Society B: Biological Sciences*.  
 [Online] 272 (1577), 2219–2224. [online]. Available from:  
<http://rspb.royalsocietypublishing.org/cgi/doi/10.1098/rspb.2005.3225>.
- Makarieva, A. M. et al. (2008) Mean mass-specific metabolic rates are strikingly similar across life's major domains: Evidence for life's metabolic optimum. *Proceedings of the National Academy of Sciences of the United States of America*. [Online] 105 (44), 16994–16999. [online]. Available from:  
<http://www.pubmedcentral.nih.gov/articlerender.fcgi?artid=2572558&tool=pmcentrez&rendertype=abstract>.
- Maldonado, R. et al. (1994) Changes of ploidy during the *Azotobacter vinelandii* growth cycle. *Journal of Bacteriology*. [Online] 176 (13), 3911–3919.
- Michelsen, O. et al. (2010) The MG1363 and IL1403 laboratory strains of *Lactococcus lactis* and several dairy strains are diploid. *Journal of Bacteriology*. [Online] 192 (4), 1058–1065.
- Mukherjee, C. et al. (2008) *Entamoeba* shows reversible variation in ploidy under different growth conditions and between life cycle phases. *PLoS neglected tropical diseases*. [Online] 2 (8), e281. [online]. Available from:  
<http://www.ncbi.nlm.nih.gov/pubmed/18714361>.
- Pecoraro, V. et al. (2011) Quantification of Ploidy in Proteobacteria Revealed the Existence of Monoploid, (Mero-)Oligoploid and Polyploid Species Syed Aziz (ed.). *PLoS ONE*. [Online] 6 (1), e16392. [online]. Available from:  
<https://dx.plos.org/10.1371/journal.pone.0016392>.
- Reis-Cunha, J. L. et al. (2015) Chromosomal copy number variation reveals differential levels of genomic plasticity in distinct *Trypanosoma cruzi* strains. *BMC genomics*. [Online] 16499. [online]. Available from:  
<http://www.ncbi.nlm.nih.gov/pubmed/26141959>.
- De Riso, V. et al. (2009) Gene silencing in the marine diatom *Phaeodactylum tricornutum*. *Nucleic acids research*. [Online] 37 (14), e96. [online]. Available

- from: <http://www.ncbi.nlm.nih.gov/pubmed/19487243>.
- Rollinson, D. (1977) *Biochemical and biological characters of Eimeria species*. University of London. [online]. Available from: <https://spiral.imperial.ac.uk/bitstream/10044/1/22766/2/Rollinson-D-1977-PhD-Thesis.pdf>.
- Romano, A. et al. (2014) Cross-species genetic exchange between visceral and cutaneous strains of *Leishmania* in the sand fly vector. *Proceedings of the National Academy of Sciences of the United States of America*. [Online] 111 (47), 16808–16813. [online]. Available from: <http://www.ncbi.nlm.nih.gov/pubmed/25385616>.
- Shoguchi, E. et al. (2013) Draft assembly of the *Symbiodinium minutum* nuclear genome reveals dinoflagellate gene structure. *Current biology : CB*. [Online] 23 (15), 1399–1408. [online]. Available from: <http://www.ncbi.nlm.nih.gov/pubmed/23850284>.
- Slabodnick, M. M. et al. (2017) The Macronuclear Genome of *Stentor coeruleus* Reveals Tiny Introns in a Giant Cell. *Current Biology*. [Online] 27 (4), 569–575. [online]. Available from: <https://linkinghub.elsevier.com/retrieve/pii/S0960982216315391>.
- Tobiason, D. M. & Seifert, H. S. (2006) The Obligate Human Pathogen, *Neisseria gonorrhoeae*, Is Polyploid Jonathon Eisen (ed.). *PLoS Biology*. [Online] 4 (6), e185. [online]. Available from: <https://dx.plos.org/10.1371/journal.pbio.0040185>.
- Willhoeft, U. & Tannich, E. (1999) The electrophoretic karyotype of *Entamoeba histolytica*. *Molecular and biochemical parasitology*. 99 (1), 41–53. [online]. Available from: <http://www.ncbi.nlm.nih.gov/pubmed/10215023>.
- Xu, W. D. et al. (1998) Chromosome numbers of *Tritrichomonas foetus* and *Tritrichomonas suis*. *Veterinary parasitology*. 78 (4), 247–251. [online]. Available from: <http://www.ncbi.nlm.nih.gov/pubmed/9786624>.
- Yang, Q. et al. (1994) Sequence organization of the *Acanthamoeba* rRNA intergenic spacer: identification of transcriptional enhancers. *Nucleic acids research*. [Online] 22 (22), 4798–4805. [online]. Available from: <http://www.ncbi.nlm.nih.gov/pubmed/7984432>.
- Yuh, Y. S. et al. (1997) Chromosome number of *Trichomonas vaginalis*. *The Journal of parasitology*. [Online] 83 (3), 551–553. [online]. Available from: <http://www.ncbi.nlm.nih.gov/pubmed/9194850>.
